# Supplementary material
Source: PubMed Central journal article supplement (PMC4790484)

**Table A: Outcome and exposure details**

| <b>Study</b>           | <b>Data source for outcomes</b>                                   | <b>Outcome</b>      | <b>Outcome definition</b>                                                                                                                                                              | <b>Shift work type</b>      | <b>Shift work description</b>                                                                    | <b>Downs &amp; Black score</b> |
|------------------------|-------------------------------------------------------------------|---------------------|----------------------------------------------------------------------------------------------------------------------------------------------------------------------------------------|-----------------------------|--------------------------------------------------------------------------------------------------|--------------------------------|
| Akerstedt et al, 2004  | Swedish Cause-of-Death register                                   | all cause mortality | total mortality regardless of cause (Chapter XVII [N800–959], according to the 8th and 9th revisions of the ICD                                                                        | mixed                       | “shift work included three-shift work, night work, evening work, roster work, and ‘other forms’” | 55%                            |
| Alfredsson et al, 1985 | Swedish hospitalization register                                  | MI                  | hospitalization for acute MI (ICD 410.00, 410.99)                                                                                                                                      | irregular                   | “other than daytime” from appendix                                                               | 66%                            |
| Allesoe et al, 2011    | Danish National Patient Registry                                  | coronary events     | first ever hospitalization for IHD, including first ever MI, other acute or chronic IHD, angina or ECG-diagnosed heart disease (ICD-8 410-414, ICD-10 I20-25)                          | rotating, night and evening | “rotating, night and evening”                                                                    | 71%                            |
| Babisch et al, 2005    | hospital discharge records                                        | MI                  | confirmed diagnosis of acute MI or survivors of sudden cardiac arrest (ICD-9 410) following the WHO definition including ischemic ECG changes, clinical symptoms and enzymatic changes | unspecified                 | not explicitly defined                                                                           | 59%                            |
| Biggi et al, 2008      | periodic medical examinations by an occupational health physician | coronary events     | incident diagnosis of coronary artery disease                                                                                                                                          | night                       | “night work is done from 23:35 to 05:35 h, Monday to Saturday”                                   | 41%                            |

|                           |                                                                                            |                                      |                                                                                                                                                                         |                    |                                                                                                                                                                                               |     |
|---------------------------|--------------------------------------------------------------------------------------------|--------------------------------------|-------------------------------------------------------------------------------------------------------------------------------------------------------------------------|--------------------|-----------------------------------------------------------------------------------------------------------------------------------------------------------------------------------------------|-----|
| Boggild et al, 1999       | National Health Service register and Danish Institute of Clinical Epidemiology register    | coronary events, all cause mortality | hospital admission for acute MI and death certificate diagnoses (ICD-8 410-414)                                                                                         | mixed              | "the participants were asked whether they worked irregular hours, shift work, often had night work...the working time information was dichotomized into daytime work and other working hours" | 86% |
| Brown et al, 2009         | self-report, National Death Index, next-of-kin report, medical records, death certificates | ischemic stroke                      | evidence of a neurologic deficit with sudden or rapid onset that persisted for >24 hours or until death, confirmed by neuroimaging in 91% of those with medical records | rotating           | "at least 3 nights/month in addition to days and evenings in that month"                                                                                                                      | 62% |
| Ellingsen et al, 2007     | company medical records                                                                    | coronary events                      | incident cases of coronary artery disease or MI                                                                                                                         | rotating           | "shift workers were defined as those who worked eight hour rotating shift cycles, starting with 2 morning shifts, followed by 2 afternoon shifts and 2 night shifts"                          | 41% |
| Falger and Schouten, 1992 | hospital records                                                                           | MI                                   | definite first acute MI based on clinical history, standard ECG readings and maximum plasma enzyme levels                                                               | unspecified        | not explicitly defined                                                                                                                                                                        | 52% |
| Fujino et al, 2006        | administrative data held at regional research centers                                      | total and cause-specific mortality   | cardiovascular death (ICD-10 I00-I99), coronary death (I20-I25), cerebrovascular death (I60-I69)                                                                        | rotating and night | "during your working life, until the present, what shift did you work most; mainly day time, mainly night (i.e. fixed-night shift), or alternative night and daytime (rotating-shift work)?"  | 66% |

|                        |                                                                                                       |                 |                                                                                                                         |       |                                                                                                                                                                                                                                                                                                                                                                                                                                  |     |
|------------------------|-------------------------------------------------------------------------------------------------------|-----------------|-------------------------------------------------------------------------------------------------------------------------|-------|----------------------------------------------------------------------------------------------------------------------------------------------------------------------------------------------------------------------------------------------------------------------------------------------------------------------------------------------------------------------------------------------------------------------------------|-----|
| Fukuoka et al, 2005    | hospital records                                                                                      | MI              | elevated cardiac enzyme levels and a history of ischemic symptoms, relevant ECG changes or coronary artery intervention | night | “sociodemographic factors included...presence/absence of night shift work”                                                                                                                                                                                                                                                                                                                                                       | 48% |
| Haupt et al, 2008      | patient interview                                                                                     | MI              | self-reported physician diagnosis of MI                                                                                 | mixed | “have you ever worked in shift and night work?”                                                                                                                                                                                                                                                                                                                                                                                  | 66% |
| Hermansson et al, 2007 | reports from hospitals and general practitioners, hospital discharge registers and death certificates | ischemic stroke | WHO MONICA criteria                                                                                                     | mixed | “the shift work variable was based on the responses to two questions from the population surveys, since the question regarding workhours was not consistent in all the surveys. One question was from VIP study [“Do you have shift work or weekend-work?], and the other question came from the MONICA study [“what are your normal work hours? Regular workhours (a), shift work (b), variable hours (c) am not employed (d)”] | 66% |

|                      |                                                                                                                                                                              |                                       |                                                                                                                                                                                                 |                       |                                                                                                                                                                                                                                                                                 |     |
|----------------------|------------------------------------------------------------------------------------------------------------------------------------------------------------------------------|---------------------------------------|-------------------------------------------------------------------------------------------------------------------------------------------------------------------------------------------------|-----------------------|---------------------------------------------------------------------------------------------------------------------------------------------------------------------------------------------------------------------------------------------------------------------------------|-----|
| Hublin et al, 2010   | administrative databases held at the Population Register Centre of Finland, Statistics Finland, the Finnish Social Insurance Institution and the Finnish Centre for Pensions | coronary death, cardiovascular events | for coronary death: underlying cause of ICD-10 I20-I24 and ICD-8/9 410-414; for cardiovascular events, disability retirement due to cardiovascular disease (ICD-10 I00-I99 and ICD-8/9 390-459) | unspecified and night | "Is your present work or the work you last were doing: (1) mainly daytime work, (2) mainly nighttime work, (3) mainly shift-work or (4) I have never been working?"                                                                                                             | 75% |
| Karlsson et al, 2005 | National Cause of Death Register (Sweden)                                                                                                                                    | total and cause-specific mortality    | death certificate diagnosis in the primary or contributory cause-of-death fields, based on five consecutive revisions of the ICD (6th-10th)                                                     | rotating              | "a typical rotating three-shift schedule has traditionally been used to meet production needs"<br>"a fourth shift was introduced to increase production"<br>"a fifth shift was introduced to comply with legislation and to improve work conditions and to increase production" | 69% |

|                      |                                                                                                                                     |                                                                   |                                                                                                                                                                                                                                                                                                                                                   |                 |                                                                                                                                                                                                   |     |
|----------------------|-------------------------------------------------------------------------------------------------------------------------------------|-------------------------------------------------------------------|---------------------------------------------------------------------------------------------------------------------------------------------------------------------------------------------------------------------------------------------------------------------------------------------------------------------------------------------------|-----------------|---------------------------------------------------------------------------------------------------------------------------------------------------------------------------------------------------|-----|
| Kawachi et al, 1995  | questionnaires, medical records, interviews, patient letters, National Death Index, reports from next-of-kin and postal authorities | coronary events, MI, total, cardiovascular and coronary mortality | MI was defined according to WHO criteria; coronary death was defined as fatal MI or CHD recorded on the death certificate as the underlying and most probable cause with previous evidence of CHD (externally corroborated); coronary events was nonfatal MI or fatal CHD; cardiovascular mortality was death from CHD or cerebrovascular disease | rotating        | all participants were asked, "what is the total number of years you worked rotating night shifts (at least 3 nights/month in addition to days or evenings in that month)?"                        | 79% |
| Knutsson et al, 1986 | death certificates, occupational health unit records, county hospital records, family members, autopsy reports                      | coronary events                                                   | WHO criteria for MI and/or angina defined by typical symptomatology (supported by positive ECG-exercise testing)                                                                                                                                                                                                                                  | rotating        | "the shift workers worked a three-shift rota and were process operators"                                                                                                                          | 66% |
| Knutsson et al, 1999 | coronary and intensive care unit reports, hospital discharge registers and death certificates                                       | MI                                                                | typical symptoms, blood marker changes, ECG changes and/or necropsy findings                                                                                                                                                                                                                                                                      | mixed and night | "a shiftworker is a person whose work schedule includes hours beyond daytime. A night workers is a person who has a work schedule that always or often includes the time between 22:00 and 06:00" | 83% |

|                                  |                                                  |                                    |                                                                                                                                           |             |                                                                                                                                                                                                                                                                        |     |
|----------------------------------|--------------------------------------------------|------------------------------------|-------------------------------------------------------------------------------------------------------------------------------------------|-------------|------------------------------------------------------------------------------------------------------------------------------------------------------------------------------------------------------------------------------------------------------------------------|-----|
| Koller, 1983                     | history-taking on a prospective medical check-up | coronary and cardiovascular events | ischemic heart disease (ICD-9 414) and cardiovascular events (414, 440-448, 458, 401-405, 454-456) as classified by a panel of physicians | rotating    | "the vast majority of shift workers were working according to a swiftly rotating continuous 4-shift system with shorter morning and afternoon shifts (7h), a longer night shift (10h) and every 4 weeks one or two especially long day shifts (14h) over the weekends" | 45% |
| Laugsand et al, 2011             | hospital records and death certificates          | MI                                 | European Society of Cardiology/American College of Cardiology consensus guidelines                                                        | mixed       | "do you have shift work, night work, or standing by duties?"                                                                                                                                                                                                           | 67% |
| Liu and Tanaka, 2002             | admissions data for 22 hospitals                 | MI                                 | ischemic cardiac pain lasting at least 30 minutes, enzyme change and supportive electrocardiography                                       | rotating    | "shift work was defined if subjects had rotating work"                                                                                                                                                                                                                 | 52% |
| McNamee et al, 1996              | death certificates                               | coronary death                     | cause of death coded as IHD on the death certificate                                                                                      | rotating    | "shift work was predominantly a three shift, one week, forward rotation system"                                                                                                                                                                                        | 59% |
| Netterstrom et al, 1999          | coronary care unit admissions from two hospitals | MI                                 | severe chest discomfort or ECG signs of MI accompanied by increased creatinine phosphokinase to at least twice the normal upper limit     | unspecified | not explicitly defined                                                                                                                                                                                                                                                 | 48% |
| Rafnsson and Gunnarsdottir, 1990 | death certificates                               | coronary and total death           | the officially classified underlying cause of death, reclassified according to ICD-7                                                      | mixed       | "shiftwork operators work indoors three shifts, day and night"                                                                                                                                                                                                         | 59% |

|                                                                |                             |                                                               |                                                                                                                                                                         |                                 |                                                                                                                                                                                                                                        |     |
|----------------------------------------------------------------|-----------------------------|---------------------------------------------------------------|-------------------------------------------------------------------------------------------------------------------------------------------------------------------------|---------------------------------|----------------------------------------------------------------------------------------------------------------------------------------------------------------------------------------------------------------------------------------|-----|
| Steenland and Fine, 1996                                       | death certificates          | coronary death                                                | death due to IHD (ICD-9 410-414) while working or within 1 week of work, with no prior indication of heart disease in their records                                     | evening and night               | not defined (2 <sup>nd</sup> and 3 <sup>rd</sup> shifts were considered evening and night shifts, respectively)                                                                                                                        | 52% |
| Tarumi, 1997                                                   | death certificates          | total and cardiovascular mortality                            | cardiovascular death listed on the death certificate and defined as death due to IHD (I20-I25) or stroke (I60-I69)                                                      | unspecified                     | not explicitly defined                                                                                                                                                                                                                 | 45% |
| Taylor and Pocock, 1972a (re-analyzed by Knutsson et al, 2004) | death certificates          | coronary, cerebrovascular, cardiovascular and total mortality | cause of death was coded in ICD-7 in accord with established rules for primary mortality tabulation                                                                     | rotating                        | “men who had completed 10 years on shift work since 1946, any interruption being for less than six months”                                                                                                                             | 45% |
| Taylor et al, 1972b                                            | personnel records           | cardiovascular events                                         | medically certified absence from work lasting more than three days with a final diagnosis recorded as cardiovascular disease (excluding varicose veins and hemorrhoids) | mixed                           | “... six main types of shift work in addition to regular day work: three-shift discontinuous, three-shift continuous (traditional), three-shift continuous (rapidly rotating), permanent nights, alternate day and night, double days” | 69% |
| Tuchsen, 1993                                                  | national inpatient register | coronary events                                               | first admission with a discharge diagnosis of ICD-8 410-414                                                                                                             | unspecified, evening, and night | “individuals belonging to occupational groups, whose at least 20% of individuals report of evening work, night work or any other form of shift work”                                                                                   | 86% |

|                              |                                                                                                             |                                        |                                                                                                                                                          |                   |                                                                                                                                                                                                                                                                         |     |
|------------------------------|-------------------------------------------------------------------------------------------------------------|----------------------------------------|----------------------------------------------------------------------------------------------------------------------------------------------------------|-------------------|-------------------------------------------------------------------------------------------------------------------------------------------------------------------------------------------------------------------------------------------------------------------------|-----|
| Tuchsen et al, 2006          | national patient register containing all hospital discharge data, outpatient data and emergency room visits | cardiovascular and coronary events     | first hospital contacts with a principal diagnosis of circulatory disease (ICD-8 390-458, ICD-10 I00-I99) or ischemic heart disease (coding unspecified) | mixed             | “What kind of work schedule do you have?” (permanent day duty/two shifts/three shifts/ fluctuating according to special schedule or rotation/permanent evening duty/permanent night duty/permanent morning duty/other”                                                  | 59% |
| Vertin, 1978                 | company medical records                                                                                     | coronary events                        | absenteeism statistics defined using ICD-7 (Dutch modification) codes for IHD                                                                            | unspecified       | not explicitly defined                                                                                                                                                                                                                                                  | 34% |
| Virkunnen et al, 2006        | hospital discharge register and register of deaths                                                          | coronary events                        | ICD-8/9 410-414, ICD-10 I20-I25 (fatal or non-fatal)                                                                                                     | mixed             | “shift work was recorded in the questionnaire on the following 6-point item: day work, part-time work, 2-shift work, 3-shift work, irregular work, and night work”                                                                                                      | 62% |
| Virtanen and Notkola, 2002   | national death register (vital statistics)                                                                  | cardiovascular, cerebrovascular deaths | cardiovascular (ICD-9 390-459) and cerebrovascular deaths (ICD-9 430-438)                                                                                | evening and night | not defined (2 <sup>nd</sup> and 3 <sup>rd</sup> shifts were considered evening and night shifts, respectively)                                                                                                                                                         | 46% |
| Yadegarfar and McNamee, 2008 | death certificates                                                                                          | coronary death                         | ICD 410-414 as determined from the code given by the UK Office of National Statistics                                                                    | mixed             | “shift workers was defined as someone who did shift work for a period of 30 days or more in total. Variety of shift patterns: three-shift continuous, forward rotation system, three shift non-continuous, seven-day double-day shifts, and five-day-double day shifts” | 66% |

Abbreviations: ECG electrocardiogram, CHD, coronary heart disease, ICD, International Classification of Diseases, IHD ischemic heart disease, MONICA Monitoring of Trends and Determinants in Cardiovascular Diseases, WHO World Health Organization



**Table B: Detailed search strategies**

| Database | Search strategy                                                                                                                                                                                                                                                                                                                                                                                                                                                                                                                                                                                                                                                                                                                                                                                                                                                                                                                                                                                                                                                                                                                                                                                                                                                                                                                                                                                                                                                                                                                                                                                                                                                                                                                                                                                                                                                                                                                                                                                                                                                                                                                                                                                                                                                                                                                                                                                                                                                                                                                                                                                                                                                                                                                                                                                                                                                                                                                                                                                                                                                                                                                                                                                                                                                                                                                                                                                                                                                             |
|----------|-----------------------------------------------------------------------------------------------------------------------------------------------------------------------------------------------------------------------------------------------------------------------------------------------------------------------------------------------------------------------------------------------------------------------------------------------------------------------------------------------------------------------------------------------------------------------------------------------------------------------------------------------------------------------------------------------------------------------------------------------------------------------------------------------------------------------------------------------------------------------------------------------------------------------------------------------------------------------------------------------------------------------------------------------------------------------------------------------------------------------------------------------------------------------------------------------------------------------------------------------------------------------------------------------------------------------------------------------------------------------------------------------------------------------------------------------------------------------------------------------------------------------------------------------------------------------------------------------------------------------------------------------------------------------------------------------------------------------------------------------------------------------------------------------------------------------------------------------------------------------------------------------------------------------------------------------------------------------------------------------------------------------------------------------------------------------------------------------------------------------------------------------------------------------------------------------------------------------------------------------------------------------------------------------------------------------------------------------------------------------------------------------------------------------------------------------------------------------------------------------------------------------------------------------------------------------------------------------------------------------------------------------------------------------------------------------------------------------------------------------------------------------------------------------------------------------------------------------------------------------------------------------------------------------------------------------------------------------------------------------------------------------------------------------------------------------------------------------------------------------------------------------------------------------------------------------------------------------------------------------------------------------------------------------------------------------------------------------------------------------------------------------------------------------------------------------------------------------------|
| Medline  | <p>1. exp Cardiovascular Diseases/ or exp Cerebrovascular Disorders/ or exp Cardiovascular Agents/ or exp Cardiovascular System/ or Actuarial Analysis/ or Cause of Death/ or Death Certificates/ or Death, Sudden/ or Death/ or exp Morbidity/ or Fatal Outcome/ or Hospital Mortality/ or Life Expectancy/ or Life Tables/ or Mortality/ or Vital Statistics/</p> <p>2. Blood Pressure Monitors/ or Blood Pressure/ or exp Blood Pressure Determination/ or Hypertension/ or (blood pressure\$ or hypertens\$ or BP or SBP or DBP or diastolic\$ or systolic\$ or antihypertens\$ or prehypertens\$).mp.</p> <p>3. (((hazard\$ or cox) adj2 model\$) or ((systolic\$ or diastolic\$) adj2 (dysfunction\$ or function\$)) or (arterial adj2 (occlusive or obstructive)) or (diabet\$ adj2 (angiopat\$ or microangiopat\$)) or (ventric\$ adj2 (dysfunction\$ or function\$ or rhythm\$ or tachycardia\$)) or actuarial\$ or aortocoronar\$ or angina or arrhythmi\$ or arteriosclero\$ or asystole\$ or cad or cardi\$ or carotid\$ or cerebral\$ or cerebro\$ or chd or chf or coronary\$ or cva\$1 or cvd or dead or death\$ or died or dying or embol\$ or fatalit\$ or heart or ihd or infarct\$ or isch?emi\$ or kaplan meier\$ or kaplan-meier\$ or lethal\$ or life table\$ or lifetable\$ or mi or morbid\$ or mortalit\$ or myocardi\$ or stroke\$1 or thrombol\$ or thrombos\$ or vascular\$ or vasculatur\$).mp.</p> <p>4. or/1-3</p> <p>5. ((on-call or oncall) and (duty or duties or hours or shift\$1)).tw.</p> <p>6. ((shift\$1 or post-shift\$ or postshift\$ or one-shift\$ or two-shift\$ or three-shift\$) adj5 (duty or duties)).tw.</p> <p>7. ((shift\$1 adj (system\$1 or breaks or hour\$)) or (hour\$ adj shift\$1)).tw.</p> <p>8. (shiftwork\$ or shift-work\$ or night-shift\$ or nightshift\$ or night work\$ or nightwork\$ or night-work\$ or off-shift\$ or night-call\$1).tw.</p> <p>9. ((overnight or night\$ or float\$) adj5 (schedul\$ or call or on-call or oncall)).tw.</p> <p>10. ((alternating or work\$ or schedule\$ or rotating or backward-rotat\$ or extended\$ or forward-rotat\$ or night\$ or day-night\$ or overnight\$ or unconventional or roster\$) adj3 (shift\$1 or post-shift\$ or postshift\$ or one-shift\$ or two-shift\$ or three-shift\$)).tw.</p> <p>11. ((night\$ adj2 (duty or duties or float\$ or work\$)) or (atypical adj (schedule\$1 or shift\$1 or hour\$1)) or (hour\$1 adj2 (float\$ or work\$))).tw.</p> <p>12. ((roster\$ or work or alternating or rotating or night\$) adj1 schedul\$).tw.</p> <p>13. Night Care/ma or exp Work Schedule Tolerance/</p> <p>14. or/5-13</p> <p>15. (ergonomics or occupational or industrial).jw. not ((microbiology or physiology or hygiene).jw. or Occupational Exposure/ or expos\$.ti. or (torque\$ or cycling\$).tw.)</p> <p>16. Personnel Staffing and Scheduling/ or Chemical Industry/ or exp Medical Staff/ or exp Nursing Staff/ or exp Work/ or Food Industry/ or Industry/ or Metallurgy/ or Occupational Diseases/ or Occupational Groups/ or Occupational Health/ or Occupational Medicine/ or Occupations/ or Railroads/ or Textile Industry/ or Workload/ or Workplace/ or ma.fs.</p> <p>17. or/15-16</p> <p>18. Chronobiology Disorders/ or Circadian Rhythm/ or "Sleep Disorders, Circadian Rhythm"/ or (shift\$1 or post-shift\$ or postshift\$ or one-shift\$ or two-shift\$ or three-shift\$ or circadian\$).tw.</p> <p>19. 17 and 18</p> |

|        |                                                                                                                                                                                                                                                                                                                                                                                                                                                                                                                                                                                                                                                                                                                                                                                                                                                                                                                                                                                                                                                                                                                                                                                                                                                                                                                                                                                                                                                                                                                                                                                                                                                                                                                                                                                                                                                                                                                                                                                                                                                                                                                                                                                                                                                                                                                                                                                                                                                                                                                                                                                                               |
|--------|---------------------------------------------------------------------------------------------------------------------------------------------------------------------------------------------------------------------------------------------------------------------------------------------------------------------------------------------------------------------------------------------------------------------------------------------------------------------------------------------------------------------------------------------------------------------------------------------------------------------------------------------------------------------------------------------------------------------------------------------------------------------------------------------------------------------------------------------------------------------------------------------------------------------------------------------------------------------------------------------------------------------------------------------------------------------------------------------------------------------------------------------------------------------------------------------------------------------------------------------------------------------------------------------------------------------------------------------------------------------------------------------------------------------------------------------------------------------------------------------------------------------------------------------------------------------------------------------------------------------------------------------------------------------------------------------------------------------------------------------------------------------------------------------------------------------------------------------------------------------------------------------------------------------------------------------------------------------------------------------------------------------------------------------------------------------------------------------------------------------------------------------------------------------------------------------------------------------------------------------------------------------------------------------------------------------------------------------------------------------------------------------------------------------------------------------------------------------------------------------------------------------------------------------------------------------------------------------------------------|
|        | <p>20. 14 or 19<br/> 21. 4 and 20<br/> 22. ((shiftwork\$ or shift-work\$ or night-shift\$ or nightshift\$ or night work\$ or nightwork\$ or night-work\$ or off-shift\$ or night-call\$1).ti. or (*Night Care/ma or exp *Work Schedule Tolerance/)) and health.ti.<br/> 23. or/21-22<br/> 24. 23 not ((animals/ or in vitro/) not (humans/ or exp persons/))<br/> 25. limit 24 to "all child (0 to 18 years)"<br/> 26. limit 24 to "all adult (19 plus years)"<br/> 27. 25 not 26<br/> 28. 24 not 27<br/> 29. limit 28 to english language</p>                                                                                                                                                                                                                                                                                                                                                                                                                                                                                                                                                                                                                                                                                                                                                                                                                                                                                                                                                                                                                                                                                                                                                                                                                                                                                                                                                                                                                                                                                                                                                                                                                                                                                                                                                                                                                                                                                                                                                                                                                                                                |
| EMBASE | <p>1. exp cardiovascular disease/ or exp cardiovascular agent/ or exp cerebrovascular disease/ or cardiovascular risk/ or exp blood pressure/ or coronary risk/ or exp cardiovascular system/ or exp cardiovascular system examination/ or exp cardiovascular parameters/ or exp cardiovascular function/ or exp death/ or death certificate/ or morbidity/ or mortality/ or life table/ or vital statistics/ or "cardiovascular diseases and cardiovascular surgery".ec.<br/> 2. exp blood pressure/ or (blood pressure\$ or hypertens\$ or BP or SBP or DBP or diastolic\$ or systolic\$ or antihypertens\$ or prehypertens\$.mp.<br/> 3. (((hazard\$ or cox) adj2 model\$) or ((systolic\$ or diastolic\$) adj2 (dysfunction\$ or function\$)) or (arterial adj2 (occlusive or obstructive)) or (diabet\$ adj2 (angiopat\$ or microangiopat\$)) or (ventric\$ adj2 (dysfunction\$ or function\$ or rhythm\$ or tachycardia\$)) or actuarial\$ or aortocoronar\$ or angina or arrhythmi\$ or arteriosclero\$ or asystole\$ or cad or cardi\$ or carotid\$ or cerebral\$ or cerebro\$ or chd or chf or coronary\$ or cva\$1 or cvd or dead or death\$ or died or dying or embol\$ or fatalit\$ or heart or ihd or infarct\$ or isch?emi\$ or kaplan meier\$ or kaplan-meier\$ or lethal\$ or life table\$ or lifetable\$ or mi or morbid\$ or mortalit\$ or myocardi\$ or stroke\$1 or thrombol\$ or thrombos\$ or vascular\$ or vasculatur\$.mp.<br/> 4. or/1-3<br/> 5. ((on-call or oncall) and (duty or duties or hours or shift\$1)).tw.<br/> 6. ((shift\$1 or post-shift\$ or postshift\$ or one-shift\$ or two-shift\$ or three-shift\$) adj5 (duty or duties)).tw.<br/> 7. ((shift\$1 adj (system\$1 or breaks or hour\$)) or (hour\$ adj shift\$1)).tw.<br/> 8. (shiftwork\$ or shift-work\$ or night-shift\$ or nightshift\$ or night work\$ or nightwork\$ or night-work\$ or off-shift\$ or night-call\$1).tw.<br/> 9. ((overnight or night\$ or float\$) adj5 (schedul\$ or call or on-call or oncall)).tw.<br/> 10. ((alternating or work\$ or schedule\$ or rotating or backward-rotat\$ or extended\$ or forward-rotat\$ or night\$ or day-night\$ or overnight\$ or unconventional or roster\$) adj3 (shift\$1 or post-shift\$ or postshift\$ or one-shift\$ or two-shift\$ or three-shift\$)).tw.<br/> 11. ((night\$ adj2 (duty or duties or float\$ or work\$)) or (atypical adj (schedule\$1 or shift\$1 or hour\$1)) or (hour\$1 adj2 (float\$ or work\$))).tw.<br/> 12. (night and work\$.hw.<br/> 13. ((roster\$ or work or alternating or rotating or night\$) adj1 schedul\$.tw.</p> |

|        |                                                                                                                                                                                                                                                                                                                                                                                                                                                                                                                                                                                                                                                                                                                                                                                                                                                                                                                                                                                                                                                                                                                                                                                                                                                                                                                                                                                                                                                                                                                                                                                                                |
|--------|----------------------------------------------------------------------------------------------------------------------------------------------------------------------------------------------------------------------------------------------------------------------------------------------------------------------------------------------------------------------------------------------------------------------------------------------------------------------------------------------------------------------------------------------------------------------------------------------------------------------------------------------------------------------------------------------------------------------------------------------------------------------------------------------------------------------------------------------------------------------------------------------------------------------------------------------------------------------------------------------------------------------------------------------------------------------------------------------------------------------------------------------------------------------------------------------------------------------------------------------------------------------------------------------------------------------------------------------------------------------------------------------------------------------------------------------------------------------------------------------------------------------------------------------------------------------------------------------------------------|
|        | <p>14. work schedule/ or shift worker/ or night work/<br/> 15. or/5-14<br/> 16. (ergonomics or occupational or industrial).jw. not ((microbiology or physiology or hygiene).jw. or occupational exposure/ or expos\$.ti. or (torque\$ or cycling\$).tw.)<br/> 17. occupational health and industrial medicine.ec. or occupational health/ or working time/ or occupational disease/ or personnel management/ or blue collar worker/ or industrial worker/ or worker/<br/> 18. or/16-17<br/> 19. sleep disorder/ or sleep deprivation/ or circadian rhythm/ or "circadian rhythm sleep disorder"/ or (shift\$1 or post-shift\$ or postshift\$ or one-shift\$ or two-shift\$ or three-shift\$).tw. or circadian\$.mp.<br/> 20. 18 and 19<br/> 21. ((shiftwork\$ or shift-work\$ or night-shift\$ or nightshift\$ or night work\$ or nightwork\$ or night-work\$ or off-shift\$ or night-call\$1).ti. or (*work schedule/ or shift worker/ or *night work/)) and health.ti.<br/> 22. 15 or 20<br/> 23. 4 and 22<br/> 24. 21 or 23<br/> 25. 24 not ((exp "miscellaneous groups of organisms"/ or exp "in vitro study"/) not (human/ or exp "miscellaneous named groups"/))<br/> 26. limit 25 to english language</p>                                                                                                                                                                                                                                                                                                                                                                                               |
| SCOPUS | <p>1. blood-pressure* or hypertens* or BP or SBP or DBP or diastolic* or systolic* or antihypertens* or prehypertens*<br/> 2. (arterial AND (occlusive or obstructive)) or (diabet* AND (angiopat* or microangiopat*)) or (ventric* AND (dysfunction* or function* or rhythm* or tachycardia*))<br/> 3. aortocoronar* or angina or arrhythmi* or arteriosclero* or asystole* or cardi* or carotid* or cerebr* or coronar* or cva* or cvd or embol* or heart* or infarct* or ischaemi* or ischemi* or morbid* or mortalit* or myocardi* or stroke* or thrombo* or vascul*<br/> 4. OR/1-3<br/> 5. ((on-call or oncall) and (duty or duties or hours or shift*))<br/> 6. ((shift* or post-shift* or postshift* or one-shift* or two-shift* or three-shift*) AND (duty or duties))<br/> 7. "shift* system*" OR "shift* breaks" OR shift-hour* OR "hour* shift*" OR shift-system*<br/> 8. shiftwork* or shift-work* or night-shift* or nightshift* or "night work*" or nightwork* or night-work* or night-call*<br/> 9. ((overnight or night* or float*) AND (schedul* or call or on-call or oncall))<br/> 10. ((worker* or rotating or night* or day-night* or overnight* or roster*) AND (shift* or post-shift* or postshift* or one-shift* or two-shift* or three-shift*))<br/> 11. night-duty OR night-duties OR night-float*<br/> 12. work-schedul* OR alternating-schedul* OR rotating-schedul* OR night-schedul*<br/> 13. OR/5-12<br/> 14. ((shiftwork* or shift-work* or night-shift* or nightshift* or night work* or nightwork* or night-work* or night-call*) AND (death* OR health* OR metabolic*))</p> |

|                                                      |                                                                                                                                                                                                                                                                                                                                                                                                                                                                                                                                                                                                                                                                                                                                                                                                                                                                                                                                                                                                                                                                                                                                                                                                                                                                                                                                                                                                                                                                                                                                                                                                                                                                                                                                                                                                                                                                                                                                                                                                                                                                                                                                                                                                                      |
|------------------------------------------------------|----------------------------------------------------------------------------------------------------------------------------------------------------------------------------------------------------------------------------------------------------------------------------------------------------------------------------------------------------------------------------------------------------------------------------------------------------------------------------------------------------------------------------------------------------------------------------------------------------------------------------------------------------------------------------------------------------------------------------------------------------------------------------------------------------------------------------------------------------------------------------------------------------------------------------------------------------------------------------------------------------------------------------------------------------------------------------------------------------------------------------------------------------------------------------------------------------------------------------------------------------------------------------------------------------------------------------------------------------------------------------------------------------------------------------------------------------------------------------------------------------------------------------------------------------------------------------------------------------------------------------------------------------------------------------------------------------------------------------------------------------------------------------------------------------------------------------------------------------------------------------------------------------------------------------------------------------------------------------------------------------------------------------------------------------------------------------------------------------------------------------------------------------------------------------------------------------------------------|
|                                                      | <p>15. ((OR/1-3) AND (OR/5-12)) OR 14<br/>LIMITS LANGUAGES = (ENGLISH)</p>                                                                                                                                                                                                                                                                                                                                                                                                                                                                                                                                                                                                                                                                                                                                                                                                                                                                                                                                                                                                                                                                                                                                                                                                                                                                                                                                                                                                                                                                                                                                                                                                                                                                                                                                                                                                                                                                                                                                                                                                                                                                                                                                           |
| <p>Science Citation Index Expanded</p>               | <p>1. blood-pressure* or hypertens* or BP or SBP or DBP or diastolic* or systolic* or antihypertens* or prehypertens*<br/> 2. (arterial AND (occlusive or obstructive)) or (diabet* AND (angiopat* or microangiopat*)) or (ventric* AND (dysfunction* or function* or rhythm* or tachycardia*))<br/> 3. aortocoronar* or angina or arrhythmi* or arteriosclero* or asystole* or cardi* or carotid* or cerebr* or coronar* or cva* or cvd or embol* or heart* or infarct* or ischaemi* or ischemi* or morbid* or mortalit* or myocardi* or stroke* or thrombo* or vascul*<br/> 4. OR/1-3<br/> 5. ((on-call or oncall) and (duty or duties or hours or shift*))<br/> 6. ((shift* or post-shift* or postshift* or one-shift* or two-shift* or three-shift*) AND (duty or duties))<br/> 7. "shift* system*" OR "shift* breaks" OR shift-hour* OR "hour* shift*" OR shift-system*<br/> 8. shiftwork* or shift-work* or night-shift* or nightshift* or "night work*" or nightwork* or night-work* or night-call*<br/> 9. ((overnight or night* or float*) AND (schemul* or call or on-call or oncall))<br/> 10. ((worker* or rotating or night* or day-night* or overnight* or roster*) AND (shift* or post-shift* or postshift* or one-shift* or two-shift* or three-shift*))<br/> 11. night-duty OR night-duties OR night-float*<br/> 12. work-schemul* OR alternating-schemul* OR rotating-schemul* OR night-schemul*<br/> 13. OR/5-12<br/> 14. ((shiftwork* or shift-work* or night-shift* or nightshift* or night work* or nightwork* or night-work* or night-call*) AND (death* OR health* OR metabolic*))<br/> 15. ((OR/1-3) AND (OR/5-12)) OR 14<br/> Refined by: Languages=( ENGLISH ) AND [excluding] Subject Areas=( EVOLUTIONARY BIOLOGY OR GEOGRAPHY, PHYSICAL OR ORNITHOLOGY OR ORTHOPEDICS OR ZOOLOGY OR TROPICAL MEDICINE OR MARINE &amp; FRESHWATER BIOLOGY OR VETERINARY SCIENCES OR FISHERIES OR FORESTRY OR MATERIALS SCIENCE, COATINGS &amp; FILMS OR OPHTHALMOLOGY OR BIODIVERSITY CONSERVATION OR OCEANOGRAPHY OR CONSTRUCTION &amp; BUILDING TECHNOLOGY OR OPTICS OR PARASITOLOGY OR ENTOMOLOGY OR PHYSICS, FLUIDS &amp; PLASMAS OR METEOROLOGY &amp; ATMOSPHERIC SCIENCES OR PLANT SCIENCES )</p> |
| <p>Conference Proceedings Citation Index-Science</p> | <p>1. blood-pressure* or hypertens* or BP or SBP or DBP or diastolic* or systolic* or antihypertens* or prehypertens*<br/> 2. (arterial AND (occlusive or obstructive)) or (diabet* AND (angiopat* or microangiopat*)) or (ventric* AND (dysfunction* or function* or rhythm* or tachycardia*))<br/> 3. aortocoronar* or angina or arrhythmi* or arteriosclero* or asystole* or cardi* or carotid* or cerebr* or coronar* or cva* or cvd or embol* or heart* or infarct* or ischaemi* or ischemi* or morbid* or mortalit* or myocardi* or stroke* or thrombo* or vascul*<br/> 4. OR/1-3<br/> 5. ((on-call or oncall) and (duty or duties or hours or shift*))<br/> 6. ((shift* or post-shift* or postshift* or one-shift* or two-shift* or three-shift*) AND (duty or duties))</p>                                                                                                                                                                                                                                                                                                                                                                                                                                                                                                                                                                                                                                                                                                                                                                                                                                                                                                                                                                                                                                                                                                                                                                                                                                                                                                                                                                                                                                   |

|                 |                                                                                                                                                                                                                                                                                                                                                                                                                                                                                                                                                                                                                                                                                                                                                                                                                                                                                                                                                                                                                                                                                                                                                                                                                                                                                                                                                                                                                                                                                                                                                                                                                                                                                    |
|-----------------|------------------------------------------------------------------------------------------------------------------------------------------------------------------------------------------------------------------------------------------------------------------------------------------------------------------------------------------------------------------------------------------------------------------------------------------------------------------------------------------------------------------------------------------------------------------------------------------------------------------------------------------------------------------------------------------------------------------------------------------------------------------------------------------------------------------------------------------------------------------------------------------------------------------------------------------------------------------------------------------------------------------------------------------------------------------------------------------------------------------------------------------------------------------------------------------------------------------------------------------------------------------------------------------------------------------------------------------------------------------------------------------------------------------------------------------------------------------------------------------------------------------------------------------------------------------------------------------------------------------------------------------------------------------------------------|
|                 | <p>7. "shift* system*" OR "shift* breaks" OR shift-hour* OR "hour* shift*" OR shift-system*</p> <p>8. shiftwork* or shift-work* or night-shift* or nightshift* or "night work*" or nightwork* or night-work* or night-call*</p> <p>9. ((overnight or night* or float*) AND (schedul* or call or on-call or oncall))</p> <p>10. ((worker* or rotating or night* or day-night* or overnight* or roster*) AND (shift* or post-shift* or postshift* or one-shift* or two-shift* or three-shift*))</p> <p>11. night-duty OR night-duties OR night-float*</p> <p>12. work-schedul* OR alternating-schedul* OR rotating-schedul* OR night-schedul*</p> <p>13. OR/5-12</p> <p>14. ((shiftwork* or shift-work* or night-shift* or nightshift* or night work* or nightwork* or night-work* or night-call*) AND (death* OR health* OR metabolic*))</p> <p>15. ((OR/1-3) AND (OR/5-12)) OR 14</p> <p>Refined by: Languages=( ENGLISH ) AND [excluding] Subject Areas=( EVOLUTIONARY BIOLOGY OR GEOGRAPHY, PHYSICAL OR ORNITHOLOGY OR ORTHOPEDICS OR ZOOLOGY OR TROPICAL MEDICINE OR MARINE &amp; FRESHWATER BIOLOGY OR VETERINARY SCIENCES OR FISHERIES OR FORESTRY OR MATERIALS SCIENCE, COATINGS &amp; FILMS OR OPHTHALMOLOGY OR BIODIVERSITY CONSERVATION OR OCEANOGRAPHY OR CONSTRUCTION &amp; BUILDING TECHNOLOGY OR OPTICS OR PARASITOLOGY OR ENTOMOLOGY OR PHYSICS, FLUIDS &amp; PLASMAS OR METEOROLOGY &amp; ATMOSPHERIC SCIENCES OR PLANT SCIENCES )</p>                                                                                                                                                                                                                              |
| BIOSIS previews | <p>1. blood-pressure* or hypertens* or BP or SBP or DBP or diastolic* or systolic* or antihypertens* or prehypertens*</p> <p>2. (arterial AND (occlusive or obstructive)) or (diabet* AND (angiopat* or microangiopat*)) or (ventric* AND (dysfunction* or function* or rhythm* or tachycardia*))</p> <p>3. aortocoronar* or angina or arrhythmi* or arteriosclero* or asystole* or cardi* or carotid* or cerebr* or coronar* or cva* or cvd or embol* or heart* or infarct* or ischaemi* or ischemi* or morbid* or mortalit* or myocardi* or stroke* or thrombo* or vascul*</p> <p>4. OR/1-3</p> <p>5. ((on-call or oncall) and (duty or duties or hours or shift*))</p> <p>6. ((shift* or post-shift* or postshift* or one-shift* or two-shift* or three-shift*) AND (duty or duties))</p> <p>7. "shift* system*" OR "shift* breaks" OR shift-hour* OR "hour* shift*" OR shift-system*</p> <p>8. shiftwork* or shift-work* or night-shift* or nightshift* or "night work*" or nightwork* or night-work* or night-call*</p> <p>9. ((overnight or night* or float*) AND (schedul* or call or on-call or oncall))</p> <p>10. ((worker* or rotating or night* or day-night* or overnight* or roster*) AND (shift* or post-shift* or postshift* or one-shift* or two-shift* or three-shift*))</p> <p>11. night-duty OR night-duties OR night-float*</p> <p>12. work-schedul* OR alternating-schedul* OR rotating-schedul* OR night-schedul*</p> <p>13. OR/5-12</p> <p>14. ((shiftwork* or shift-work* or night-shift* or nightshift* or night work* or nightwork* or night-work* or night-call*) AND (death* OR health* OR metabolic*))</p> <p>15. ((OR/1-3) AND (OR/5-12)) OR 14</p> |

|                       |                                                                                                                                                                                                                                                                                                                                                                                                                                                                                                                                                                                                                                                                                                                                                                                                                                                                                                                                                                                                                                                                                                                                                                                                        |
|-----------------------|--------------------------------------------------------------------------------------------------------------------------------------------------------------------------------------------------------------------------------------------------------------------------------------------------------------------------------------------------------------------------------------------------------------------------------------------------------------------------------------------------------------------------------------------------------------------------------------------------------------------------------------------------------------------------------------------------------------------------------------------------------------------------------------------------------------------------------------------------------------------------------------------------------------------------------------------------------------------------------------------------------------------------------------------------------------------------------------------------------------------------------------------------------------------------------------------------------|
|                       | <p>Refined by: Languages=( ENGLISH ) AND [excluding] Major Concepts=( BIOGEOGRAPHY OR PEST ASSESSMENT CONTROL AND MANAGEMENT OR CELL BIOLOGY OR PARASITOLOGY OR PESTICIDES OR MORPHOLOGY OR MEMBRANES OR ESTUARINE ECOLOGY OR SOIL SCIENCE OR BIODIVERSITY OR EVOLUTION AND ADAPTATION OR WILDLIFE MANAGEMENT OR FRESHWATER ECOLOGY OR FORESTRY OR MARINE ECOLOGY OR ANIMAL HUSBANDRY OR ANTHROPOLOGY )</p>                                                                                                                                                                                                                                                                                                                                                                                                                                                                                                                                                                                                                                                                                                                                                                                            |
| <p>Google Scholar</p> | <p>"shift work" AND (coronary OR cardiovascular OR myocardial OR ischemic OR infarction OR infarct OR stroke OR cerebrovascular OR ischemia OR vascular OR angina OR mortality OR morbidity OR death OR dead OR chd OR cad OR ihd)</p> <p>"shiftwork" AND (coronary OR cardiovascular OR myocardial OR ischemic OR infarction OR infarct OR stroke OR cerebrovascular OR ischemia OR vascular OR angina OR mortality OR morbidity OR death OR dead OR chd OR cad OR ihd)</p> <p>"rotating work" AND (coronary OR cardiovascular OR myocardial OR ischemic OR infarction OR infarct OR stroke OR cerebrovascular OR ischemia OR vascular OR angina OR mortality OR morbidity OR death OR dead OR chd OR cad OR ihd)</p> <p>"night work" AND (coronary OR cardiovascular OR myocardial OR ischemic OR infarction OR infarct OR stroke OR cerebrovascular OR ischemia OR vascular OR angina OR mortality OR morbidity OR death OR dead OR chd OR cad OR ihd)</p> <p>"evening work" AND (coronary OR cardiovascular OR myocardial OR ischemic OR infarction OR infarct OR stroke OR cerebrovascular OR ischemia OR vascular OR angina OR mortality OR morbidity OR death OR dead OR chd OR cad OR ihd)</p> |

**Table C. Event counts in exposure (shift work) and comparison groups**

| Study, year               | Outcome               | Exposure group |          | Comparison group |          |
|---------------------------|-----------------------|----------------|----------|------------------|----------|
|                           |                       | events         | subjects | events           | subjects |
| Akerstedt et al, 2004     | all cause mortality   | 127            | 3436     | 737              | 18975    |
| Alfredsson et al., 1985   | myocardial infarction | NR             | NR       | NR               | NR       |
| Allesoe et al., 2011      | coronary events       | NR             | NR       | NR               | NR       |
| Babisch et al., 2005      | myocardial infarction | 464            | 952      | 1417             | 3163     |
| Biggi et al., 2008        | coronary events       | 8              | 311      | 2                | 157      |
| Boggild et al., 1999      | coronary events       | 208            | 1123     | 798              | 4084     |
|                           | all cause mortality   | 355            | 1123     | 1324             | 4084     |
| Brown et al., 2009        | ischemic stroke       | 1038           | 47664    | 622              | 32444    |
| Ellingsen et al., 2007    | coronary events       | 27             | 648      | 40               | 1914     |
|                           | cardiovascular events | 87             | 648      | 136              | 1914     |
| Falger and Schouten, 1992 | myocardial infarction | 99             | 194      | 34               | 72       |
| Fujino et al., 2006       | coronary death        | 18             | 2011     | 63               | 14774    |
|                           | cerebrovascular death | 16             | 2011     | 109              | 14774    |
|                           | cardiovascular death  | 48             | 2011     | 235              | 14774    |
|                           | all cause mortality   | 144            | 2011     | 1138             | 14774    |
| Fukuoka et al., 2005      | myocardial infarction | 6              | 10       | 41               | 84       |
| Haupt et al., 2008        | myocardial infarction | 55             | 698      | 85               | 1812     |
| Hermanson et al., 2007    | ischemic stroke       | 44             | 138      | 150              | 469      |
| Hublin et al., 2010       | coronary death        | NR             | NR       | NR               | NR       |
|                           | cardiovascular events | NR             | NR       | NR               | NR       |
| Karlsson et al., 2005     | coronary death        | 287            | 2354     | 375              | 3088     |
|                           | cerebrovascular death | 35             | 2354     | 34               | 3088     |

| Study, year                      | Outcome               | Exposure group |          | Comparison group |          |
|----------------------------------|-----------------------|----------------|----------|------------------|----------|
|                                  |                       | events         | subjects | events           | subjects |
|                                  | all cause mortality   | 760            | 2354     | 1090             | 3088     |
| Kawachi et al., 1995             | myocardial infarction | 170            | 46956    | 78               | 32153    |
|                                  | coronary events       | 199            | 46956    | 93               | 32153    |
|                                  | coronary mortality    | 29             | 46956    | 15               | 32153    |
|                                  | cardiovascular death  | NR             | NR       | NR               | NR       |
|                                  | all cause mortality   | NR             | NR       | NR               | NR       |
| Knutsson et al., 1986            | coronary events       | 34             | 373      | 9                | 110      |
| Knutsson et al., 1999            | myocardial infarction | 349            | 658      | 1657             | 3990     |
| Koller, 1983                     | coronary events       | 7              | 199      | 0                | 68       |
|                                  | cardiovascular events | 38             | 199      | 5                | 68       |
| Liu and Tanaka, 2002             | myocardial infarction | 29             | 74       | 231              | 631      |
| Laugsand et al., 2011            | myocardial infarction | NR             | NR       | NR               | NR       |
| McNamee et al., 1996             | coronary death        | 305            | 631      | 162              | 303      |
| Netterstrom et al., 1999         | myocardial infarction | 12             | 37       | 64               | 215      |
| Rafnsson and Gunnarsdottir, 1990 | myocardial infarction | NA             | NA       | NA               | NA       |
| Steenland and Fine, 1996         | coronary death        | 38             | 210      | 117              | 679      |
|                                  |                       |                |          |                  |          |
| Tarumi, 1997                     | cardiovascular death  | NR             | NR       | NR               | NR       |
|                                  | all cause mortality   | NR             | NR       | NR               | NA       |
| Taylor and Pocock, 1972          | coronary death        | NA             | NA       | NA               | NA       |
|                                  | cerebrovascular death | NA             | NA       | NA               | NA       |
|                                  | cardiovascular death  | NA             | NA       | NA               | NA       |
|                                  | all cause mortality   | 722            | 4188     | 736              | 3860     |



| Study, year                  | Outcome               | Exposure group |          | Comparison group |          |
|------------------------------|-----------------------|----------------|----------|------------------|----------|
|                              |                       | events         | subjects | events           | subjects |
| Taylor et al., 1972          | cardiovascular events | 12             | 774      | 18               | 774      |
| Tuchsen, 1993                | cardiovascular events | NA             | NA       | NA               | NA       |
| Tuchsen et al., 2006         | cardiovascular events | 113            | 927      | 449              | 4528     |
|                              | coronary events       | 29             | 927      | NR               | NR       |
| Vertin, 1978                 | coronary events       | 2              | 100      | 2                | 100      |
| Virkunnen et al., 2006       | cardiovascular        | 148            | 664      | 196              | 1140     |
| Virtanen and Notkola, 2002   | cerebrovascular death | NA             | NA       | NA               | NA       |
| Yadegarfar and McNamee, 2008 | coronary death        | 354            | 694      | 281              | 576      |

Abbreviations: NR Not reported, NA Not applicable (because these studies used the event rate in general population to calculate standardized estimates)

**Table D. Meta-regression for all coronary events and subgroup analyses by shift schedule**

| <b>Covariate</b>                                           | <b>Estimated <math>\beta</math> coefficient (95% CI)</b> | <b>P value</b> | <b><math>r^2</math></b> |
|------------------------------------------------------------|----------------------------------------------------------|----------------|-------------------------|
| study design (cohort vs. case-control)                     | -0.14 (-0.34 to 0.07)                                    | 0.19           | 0.032                   |
| study region (Europe vs. other)                            | 0.17 (-0.09 to 0.44)                                     | 0.19           | 0.032                   |
| accrual start (per decade from 1940)                       | 0.04 (-0.01 to 0.09)                                     | 0.11           | 0.029                   |
| maximum follow-up (per decade)                             | 0.00 (-0.08 to 0.07)                                     | 0.95           | 0.044                   |
| sample size (per 1000 subjects)                            | 0.00 (0.00 to 0.01)                                      | 0.44           | 0.018                   |
| % shift workers (of total sample)                          | -0.11 (-0.65 to 0.43)                                    | 0.70           | 0.031                   |
| mean age (per 10 years)                                    | -0.01 (-0.12 to 0.11)                                    | 0.92           | 0.038                   |
| % male (of total sample)                                   | 0.02 (-0.25 to 0.28)                                     | 0.90           | 0.035                   |
| % blue-collar (of total sample)                            | -0.02 (-0.28 to 0.24)                                    | 0.88           | 0.012                   |
| rotating shift work                                        | -0.06 (-0.25 to 0.14)                                    | 0.57           | 0.031                   |
| event type (MI vs. other coronary event)                   | 0.05 (-0.15 to 0.25)                                     | 0.63           | 0.033                   |
| data source for outcomes (primary vs. administrative data) | -0.17 (-0.37 to 0.02)                                    | 0.08           | 0.032                   |
| sample risk (events per 100-person-years)                  | -0.12 (-0.40 to 0.16)                                    | 0.39           | 0.420                   |
| control group (day workers vs. general population)         | 0.07 (-0.16 to 0.29)                                     | 0.54           | 0.032                   |
| adjustment (unadjusted vs. adjusted)                       | -0.50 (-1.06 to 0.06)                                    | 0.08           | 0.031                   |
| number of confounders adjusted for                         | -0.01 (-0.03 to 0.01)                                    | 0.28           | 0.032                   |
| SES-adjusted                                               | -0.12 (-0.03 to 0.07)                                    | 0.21           | 0.031                   |
| smoking-adjusted                                           | -0.12 (-0.31 to 0.07)                                    | 0.22           | 0.031                   |
| risk analysis incorporates follow-up time                  | 0.06 (-0.14 to 0.27)                                     | 0.54           | 0.033                   |
| methodological quality (Downs and Black scale)             | -0.60 (-1.46 to 0.26)                                    | 0.17           | 0.030                   |

|                                            |                            |                      |                |
|--------------------------------------------|----------------------------|----------------------|----------------|
| study power (1-β)                          | 0.12 (-0.13 to 0.39)       | 0.34                 | 0.029          |
| duration of shift work (per decade)        | 0.01 (-0.12 to 0.13)       | 0.94                 | 0.000          |
| <b>Subgroup analyses by shift schedule</b> | <b>Risk ratio (95% CI)</b> | <b>r<sup>2</sup></b> | <b>P value</b> |
| evening                                    | 1.29 (0.69 to 2.41)        | 94%                  | 0.43           |
| irregular or unspecified                   | 1.28 (1.01 to 1.63)        | 92%                  | 0.04           |
| mixed                                      | 1.22 (1.08 to 1.38)        | 46%                  | 0.001          |
| night                                      | 1.41 (1.13 to 1.76)        | 36%                  | 0.002          |
| rotating                                   | 1.21 (1.00 to 1.46)        | 71%                  | 0.0495         |

Abbreviations: MI, myocardial infarction; SES, socioeconomic status

**Figure A. Literature search and selection**

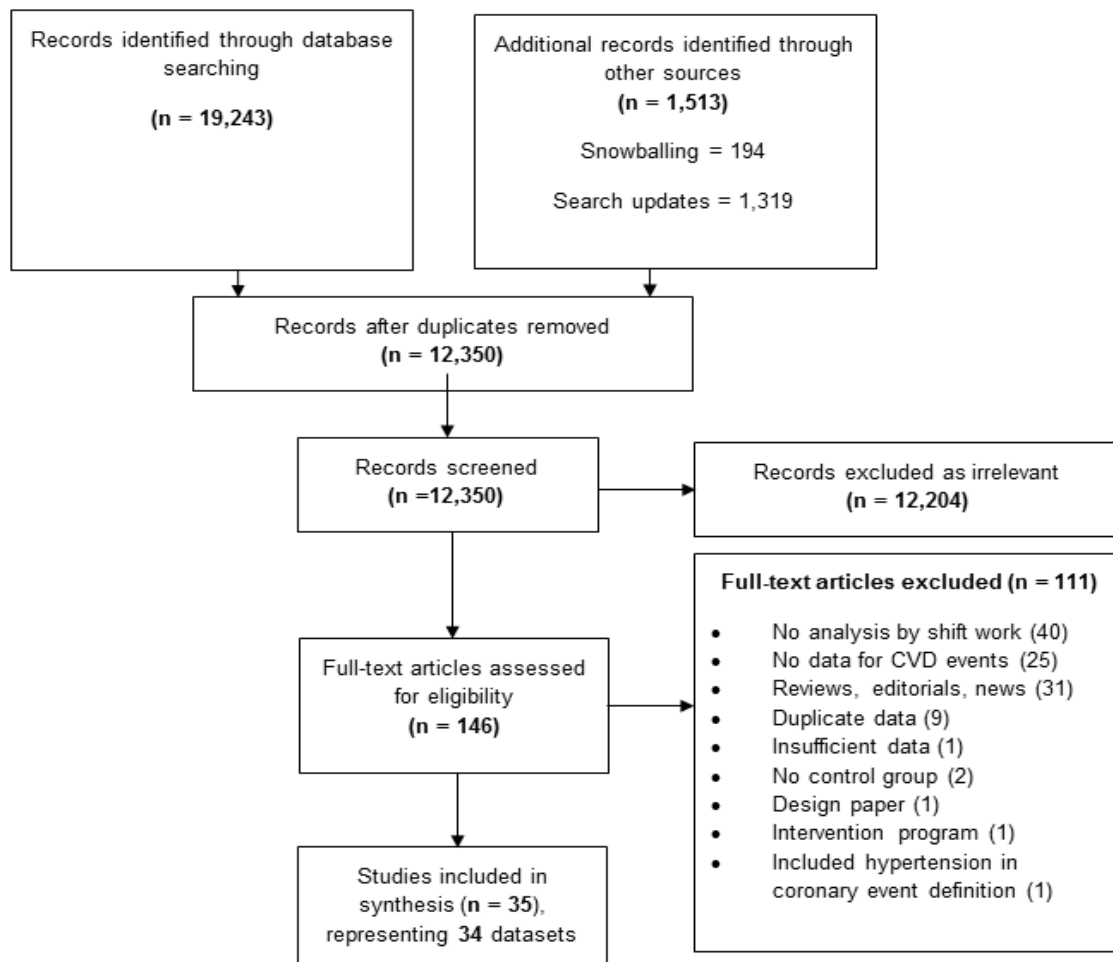

**Figure B. Risk of bias in primary studies**

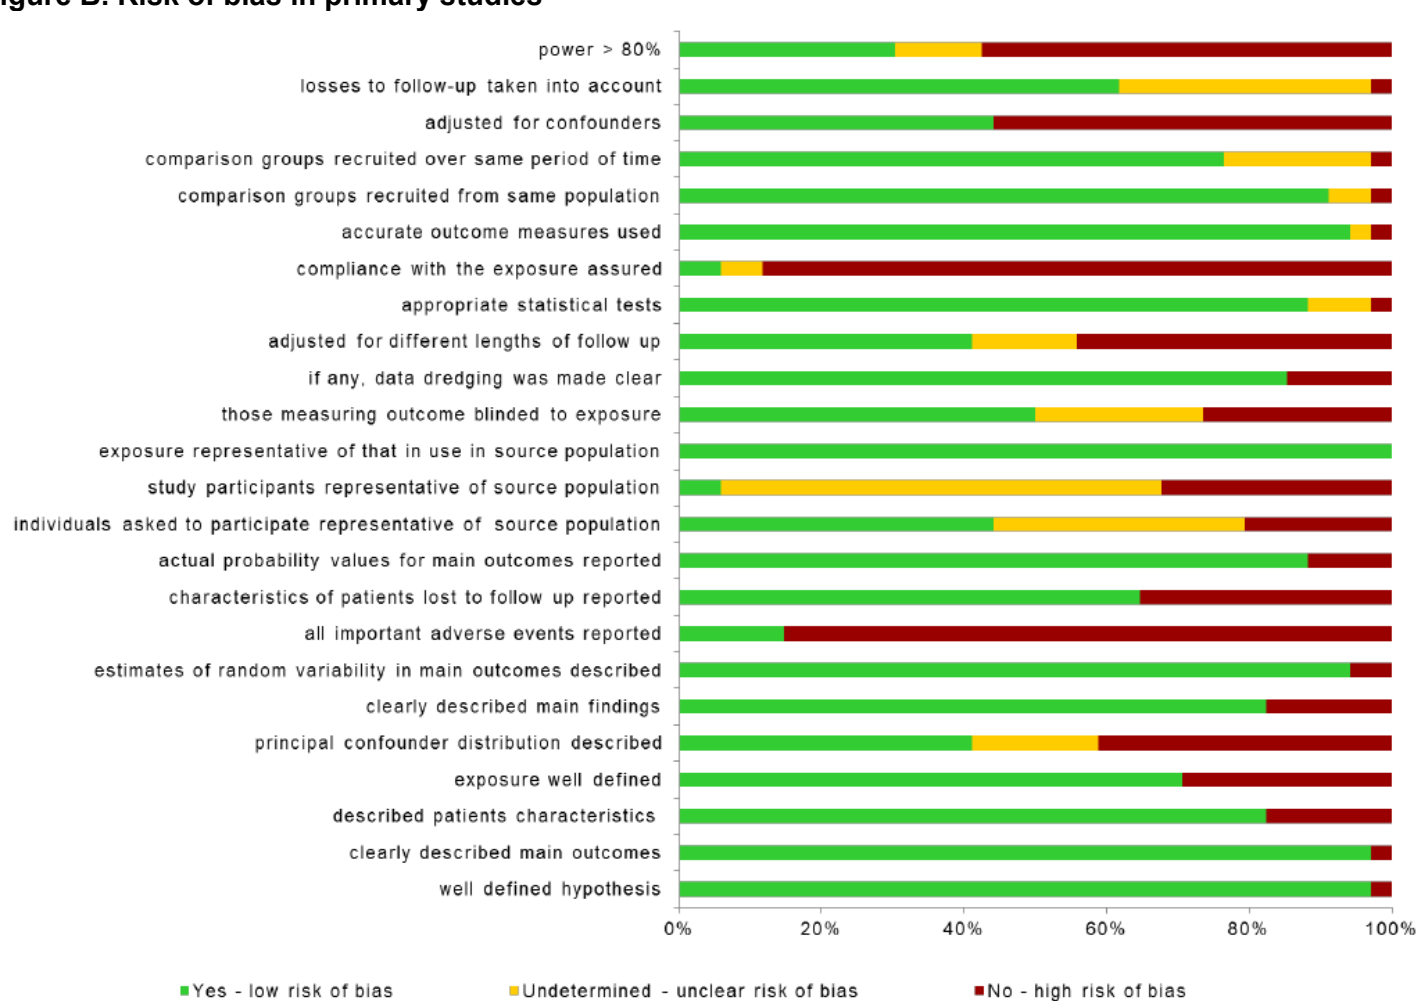

Figure C. Meta-analysis of myocardial infarction and ischaemic stroke

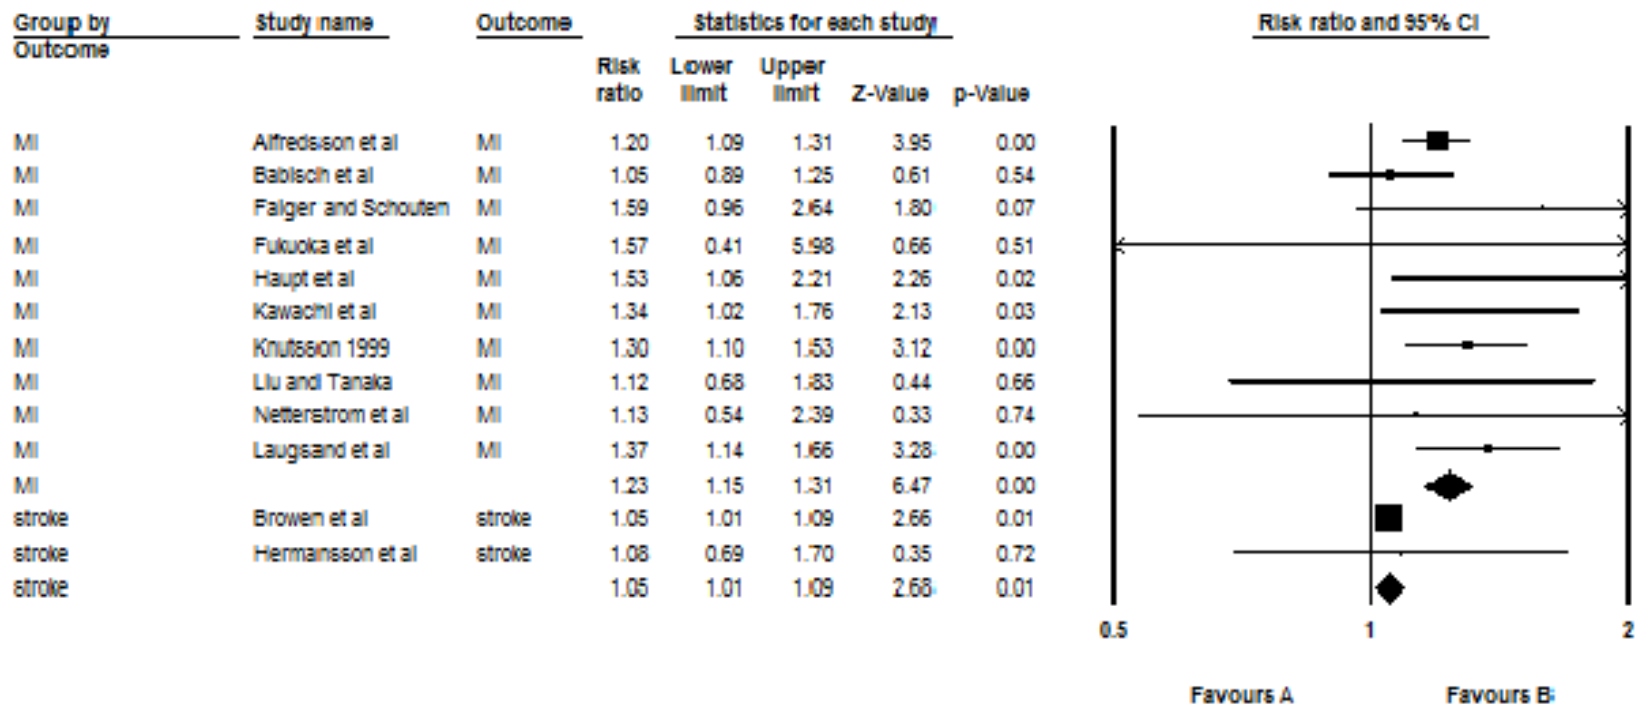

**Figure D. Meta-analysis of secondary outcomes**

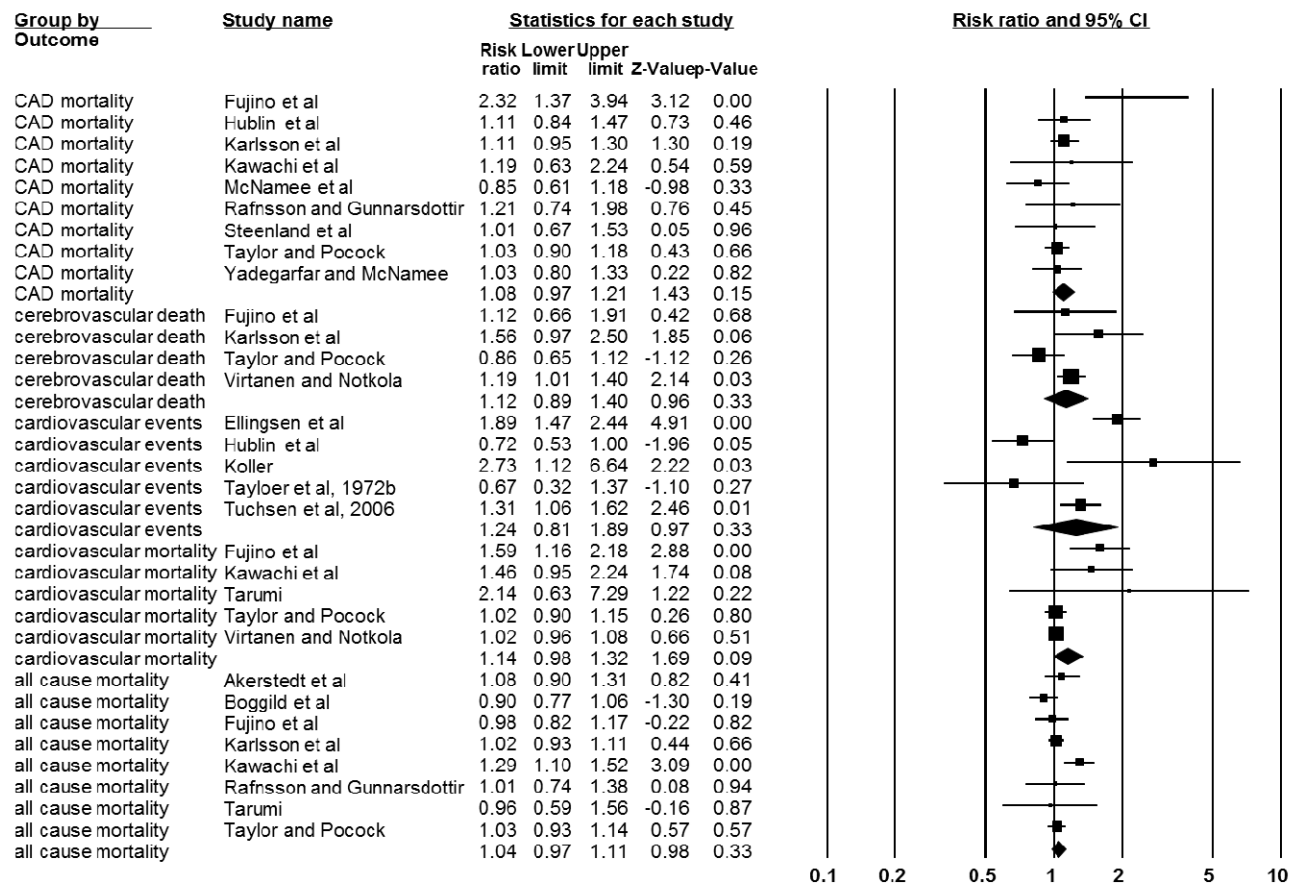

Supplement: vyam004609.ww1_default.pdf [file vyam004609.ww1_default.pdf]
